# Supplementary material for: Bioinks for Space Missions: The Influence of Long‐Term Storage of Alginate‐Methylcellulose‐Based Bioinks on Printability as well as Cell Viability and Function
Source: PubMed Central journal article supplement — Adv Healthc Mater. 2023 May 12;12(23):2300436. doi: 10.1002/adhm.202300436 (PMC11468998; doi:10.1002/adhm.202300436), 2023-05-12
Supplement: ADHM-12-2300436-s001.pdf [file ADHM-12-2300436-s001.pdf]

# ADVANCED HEALTHCARE MATERIALS

## Supporting Information

for *Adv. Healthcare Mater.*, DOI 10.1002/adhm.202300436

Bioinks for Space Missions: The Influence of Long-Term Storage of  
Alginate-Methylcellulose-Based Bioinks on Printability as well as Cell Viability and Function

*Johannes Windisch, Olena Reinhardt, Sarah Duin, Kathleen Schütz, Nuria Juliana Novoa  
Rodriguez, Suihong Liu, Anja Lode and Michael Gelinsky\**

## Supplementary Data

### Bioinks for Space Missions: the Influence of Long-term Storage of Alginate-Methylcellulose Based Bioinks on Printability as well as Cell Viability and Function

Johannes Windisch, Olena Reinhardt, Sarah Duin, Kathleen Schütz, Nuria Juliana Novoa Rodriguez, Suihong Liu, Anja Lode, Michael Gelinsky\*

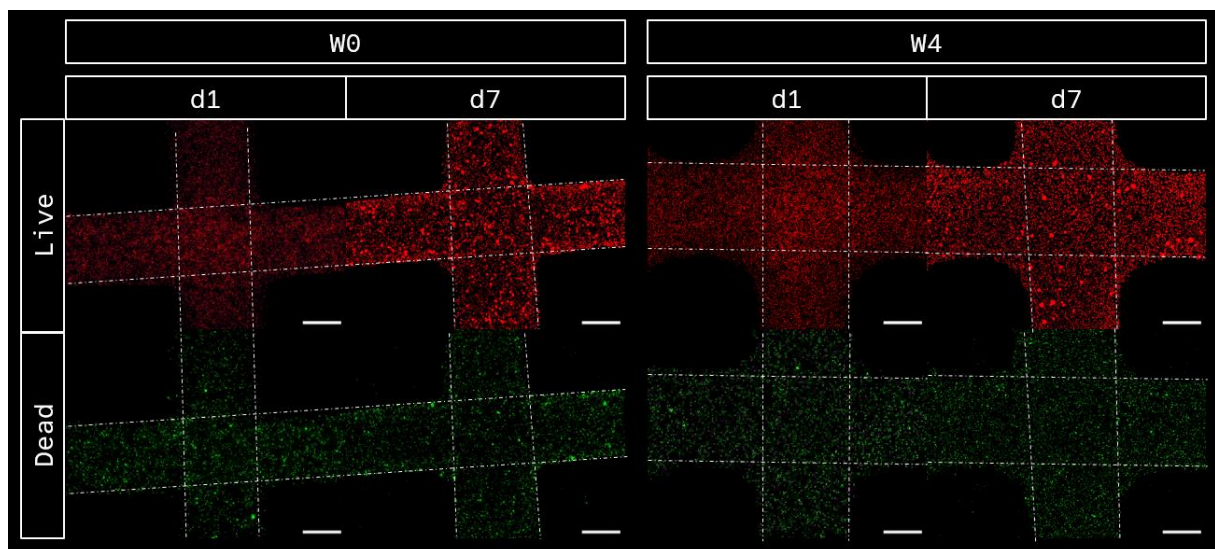

Figure S1: Representative fluorescence microscopic images of live (red, chlorophyll autofluorescence) and dead (green, stained with SYTOX™ Green nucleic acid stain) cells of *Chlorella vulgaris* embedded in printed and crosslinked scaffolds after 1 and 7 days of cultivation. *C. vulgaris*-laden Alg-MC bioinks were used for bioprinting immediately after preparation (W0) and at different time points of bioink storage at 4°C (W1-W4); the bioinks were brought to room temperature before bioprinting. The dashed lines outline the strand structure of the scaffolds. Scale bars = 200 µm.

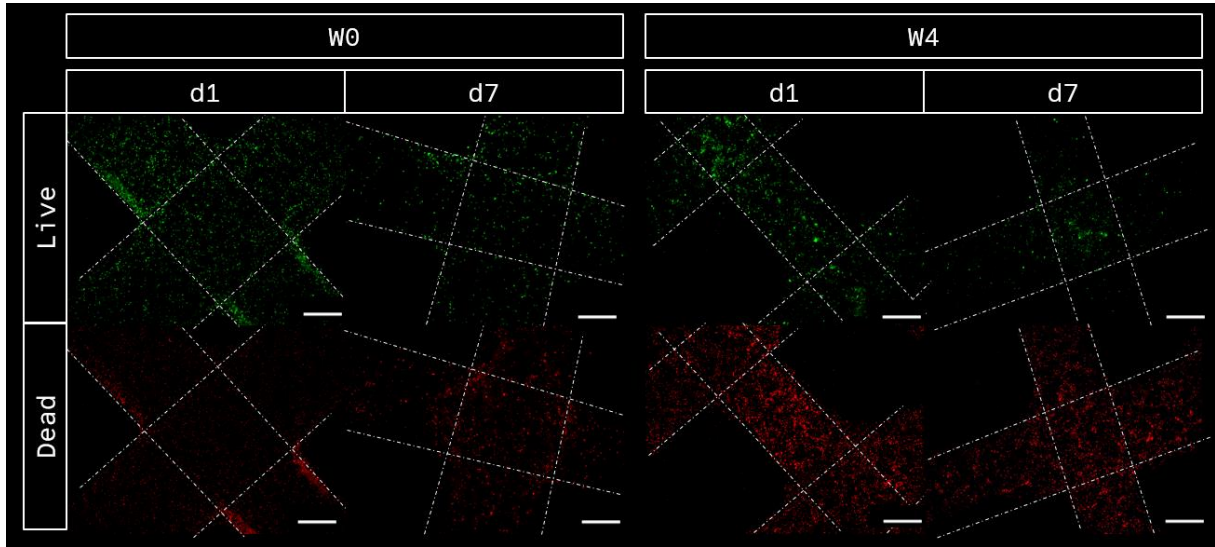

Figure S2: Representative fluorescence microscopic images of live (green, stained with CalceinAM) and dead (red, stained with ethidium homodimer1) cells of hTERT-MSC-laden PBS-Alg-MC scaffolds after 1 and 7 days of cultivation. hTERT-MSC-laden PBS-Alg-MC bioinks were used for bioprinting immediately after preparation (W0) and at different time points of bioink storage at 4°C (W1-W4); the bioinks were brought to room temperature before bioprinting. The dashed lines outline the strand structure of the scaffolds. Scale bars = 200  $\mu$ m.

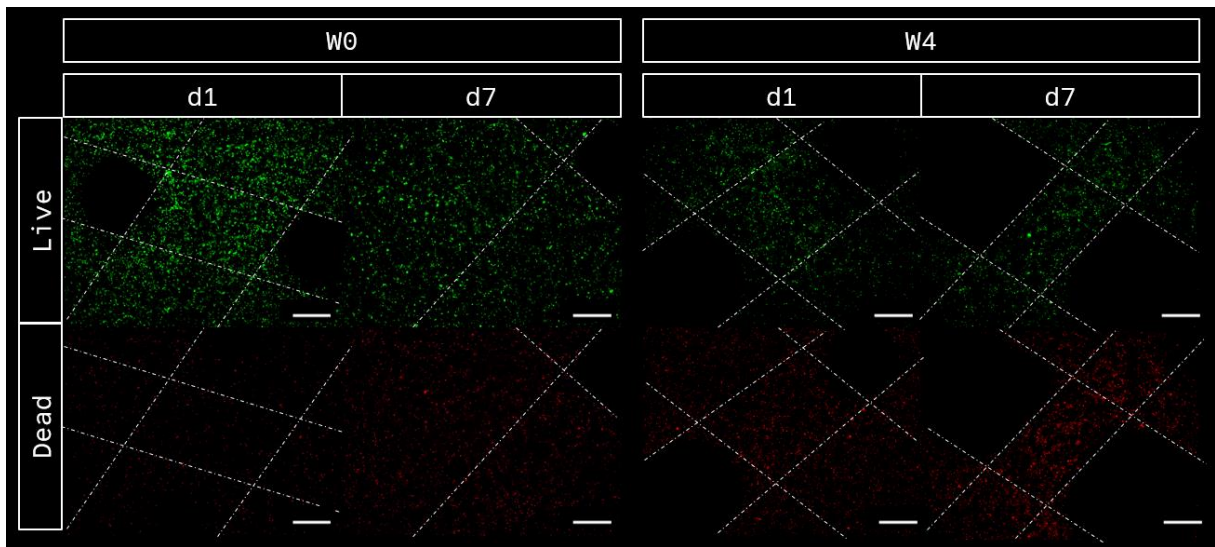

Figure S2: Representative fluorescence microscopic images of live (green, stained with CalceinAM) and dead (red, stained with ethidium homodimer1) cells of hTERT-MSC-laden Plasma-Alg-MC scaffolds after 1 and 7 days of cultivation. hTERT-MSC-laden Plasma-Alg-MC bioinks were used for bioprinting immediately after preparation (W0) and at different time points of bioink storage at 4°C (W1-W4); the bioinks were brought to room temperature before bioprinting. The dashed lines outline the strand structure of the scaffolds. Scale bars = 200  $\mu$ m.

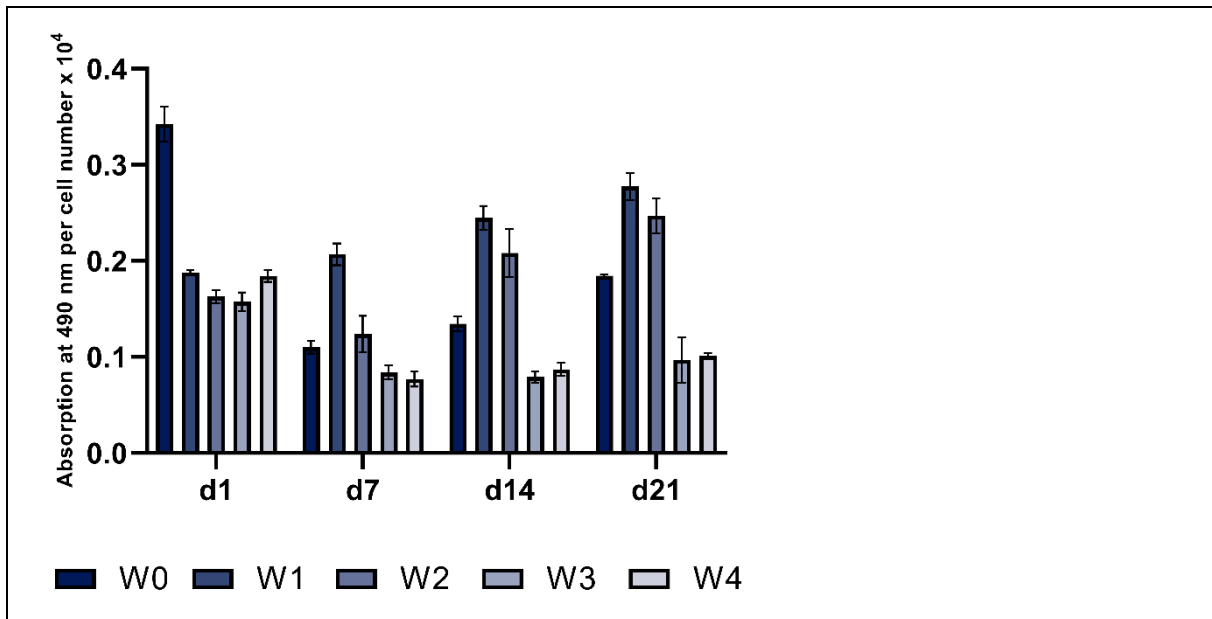

Figure S3: Relative DNA content specific LDH activity of SaOS embedded in printed and crosslinked scaffolds after 1, 7, 14 and 21 days of cultivation. SaOS-laden Plasma-Alg-MC bioinks were used for bioprinting immediately after preparation (W0) and at different time points of bioink storage at 4°C (W1-W4); the bioinks were brought to room temperature before bioprinting.

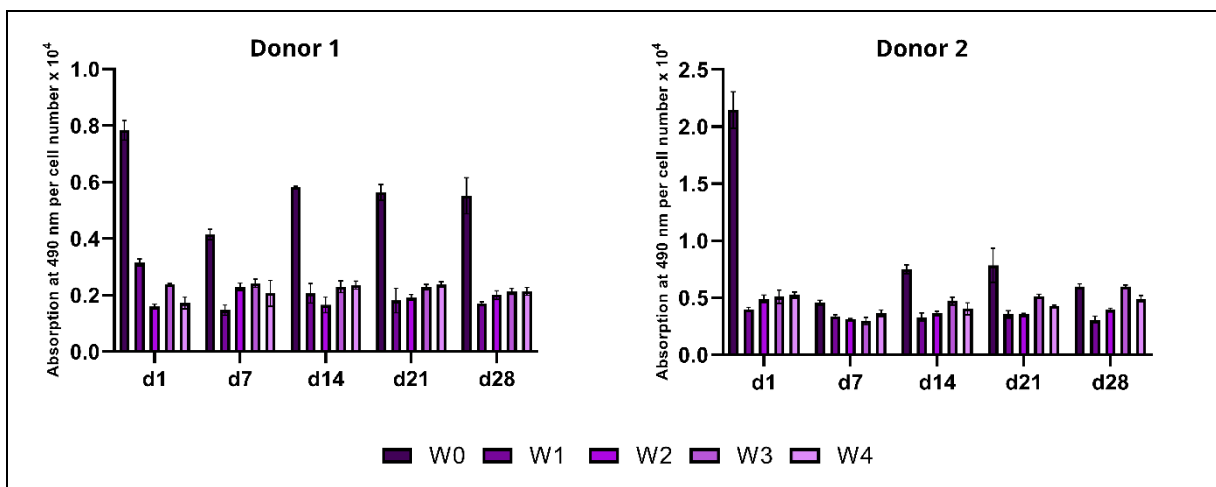

Figure S4: Relative DNA content specific LDH activity of DPSC embedded in printed and crosslinked scaffolds after 1, 7, 14, 21, and 28 days of cultivation. DPSC-laden Plasma-Alg-MC bioinks were used for bioprinting immediately after preparation (W0) and at different time points of bioink storage at 4°C (W1-W4); the bioinks were brought to room temperature before bioprinting.
